# Supplementary material for: The Impact of Statins on the Survival of Patients with Advanced Hepatocellular Carcinoma Treated with Sorafenib or Lenvatinib
Source: MDPI journal article supplement (doi:10.3390/cancers16020249), 2024-01-05
Supplement: s1 [file s1]

# Supplementary Materials: The Impact of Statins on the Survival of Patients with Advanced Hepatocellular Carcinoma Treated with Sorafenib or Lenvatinib

Ji Eun Han, Jisu Kim, Jae Youn Cheong, Soon Sun Kim, Sun Gyo Lim, Min Jae Yang, Choong-Kyun Noh, Gil Ho Lee, Jung Woo Eun, Bumhee Park and Hyo Jung Cho

**Table S1.** Survival outcomes according to statin type.

| Outcomes                    | Lipophilic statin |      |        |         |        | Hydrophilic statin |      |        |         |        |
|-----------------------------|-------------------|------|--------|---------|--------|--------------------|------|--------|---------|--------|
|                             | No                |      | Yes    |         |        | No                 |      | Yes    |         |        |
|                             | ref               | HR   | 95% CI | P-value |        | ref                | HR   | 95% CI | P-value |        |
| PFS (unadjusted HR, 95% CI) | ref               | 0.74 | 0.69   | 0.80    | <0.001 | ref                | 0.63 | 0.57   | 0.69    | <0.001 |
| OS (unadjusted HR, 95% CI)  | ref               | 0.75 | 0.69   | 0.81    | <0.001 | ref                | 0.59 | 0.53   | 0.66    | <0.001 |

Abbreviations: CI, confidence interval; HR, hazard ratio; OS, overall survival; PFS, progression-free survival.

**Table S2.** Survival outcomes according to statin dose.

| Outcomes                    | <181 cDDD | 181–365 cDDD |        |         |        | 366–730 cDDD |        |         |       | 731–1,095 cDDD |        |         |         | ≥1,096 cDDD |        |         |        |
|-----------------------------|-----------|--------------|--------|---------|--------|--------------|--------|---------|-------|----------------|--------|---------|---------|-------------|--------|---------|--------|
|                             | ref       | HR           | 95% CI | P-value |        | HR           | 95% CI | P-value |       | HR             | 95% CI | P-value |         | HR          | 95% CI | P-value |        |
|                             |           |              |        |         |        |              |        |         |       |                |        |         |         |             |        |         |        |
| PFS (unadjusted HR, 95% CI) |           | 1.14         | 0.96   | 1.37    | 0.1385 | 0.97         | 0.81   | 1.15    | 0.697 | 0.56           | 0.46   | 0.69    | <0.0001 | 0.34        | 0.28   | 0.41    | <0.001 |
| OS (unadjusted HR, 95% CI)  |           | 1.19         | 0.99   | 1.44    | 0.0646 | 0.92         | 0.77   | 1.11    | 0.397 | 0.60           | 0.48   | 0.75    | <0.0001 | 0.34        | 0.28   | 0.42    | <0.001 |

Abbreviations: cDDD, cumulative defined daily doses; CI, confidence interval; HR, hazard ratio; OS, overall survival; PFS, progression-free survival.

**Table S3.** Univariate and multivariate cox regression analysis for OS treated with sorafenib according to statin use in a PS-matched cohort.

| Variables                    | Univariate analysis |           |         | Multivariate analysis |           |         |
|------------------------------|---------------------|-----------|---------|-----------------------|-----------|---------|
|                              | HR                  | 95% CI    | P-value | HR                    | 95% CI    | P-value |
| Statin use, yes              | 0.71                | 0.66–0.76 | <0.001  | 0.76                  | 0.71–0.82 | <0.001  |
| Age, ≥60 yr                  | 0.99                | 0.94–1.04 | 0.624   | 1.00                  | 1.00–1.01 | 0.245   |
| Sex, female                  | 0.93                | 0.86–1.01 | 0.080   | 0.95                  | 0.87–1.02 | 0.174   |
| Region, urban                | 0.96                | 0.89–1.03 | 0.249   | 0.86                  | 0.81–0.92 | <0.001  |
| DM, yes                      | 0.92                | 0.86–0.99 | 0.022   | 0.94                  | 0.87–1.01 | 0.085   |
| Fatty liver, yes             | 0.90                | 0.84–0.96 | 0.001   | 0.95                  | 0.89–1.01 | 0.100   |
| HTN, yes                     | 0.80                | 0.75–0.85 | <0.001  | 0.87                  | 0.82–0.92 | <0.001  |
| Cardiovascular disease, yes  | 0.86                | 0.81–0.91 | <0.001  | 0.93                  | 0.88–0.98 | 0.010   |
| Cerebrovascular disease, yes | 0.86                | 0.80–0.92 | <0.001  |                       |           |         |
| Aspirin use, yes             | 0.61                | 0.53–0.70 | <0.001  | 0.63                  | 0.55–0.73 | <0.001  |
| DPP-4 inhibitor use, yes     | 0.85                | 0.75–0.95 | 0.006   | 0.89                  | 0.79–1.00 | 0.060   |
| Insulin use, yes             | 1.14                | 1.07–1.22 | <0.001  | 1.20                  | 1.12–1.28 | <0.001  |
| Metformin use, yes           | 0.75                | 0.65–0.87 | <0.001  | 0.77                  | 0.66–0.91 | 0.002   |
| SGLT-2 inhibitor use, yes    | 0.60                | 0.41–0.88 | 0.010   | 0.69                  | 0.47–1.02 | 0.062   |
| Sulfonylurea use, yes        | 0.76                | 0.63–0.91 | 0.003   | 0.82                  | 0.67–0.99 | 0.044   |
| Thiazolidinedione use, yes   | 0.65                | 0.47–0.89 | 0.007   | 0.76                  | 0.55–1.05 | 0.099   |

Abbreviations: CI, confidence interval; HR, hazard ratio; DM, diabetes mellitus; HTN, hypertension; DPP, dipeptidyl peptidase; OS, overall survival; PS, propensity score; SGLT, sodium-glucose co-transporter.

**Table S4.** Univariate and multivariate cox regression analysis for PFS treated with sorafenib according to statin use in a PS-matched cohort.

| Variables                    | Univariate analysis |           |         | Multivariate analysis |           |         |
|------------------------------|---------------------|-----------|---------|-----------------------|-----------|---------|
|                              | HR                  | 95% CI    | P-value | HR                    | 95% CI    | P-value |
| Statin use, yes              | 0.72                | 0.67–0.76 | <0.001  | 0.78                  | 0.73–0.84 | <0.001  |
| Age, ≥60 yr                  | 1.04                | 0.99–1.09 | 0.156   | 1.01                  | 1.00–1.01 | 0.002   |
| Sex, female                  | 0.98                | 0.91–1.06 | 0.603   | 1.01                  | 0.93–1.09 | 0.878   |
| Region, urban                | 0.88                | 0.82–0.94 | <0.001  | 0.86                  | 0.81–0.92 | <0.001  |
| DM, yes                      | 0.91                | 0.85–0.98 | 0.007   | 0.94                  | 0.88–1.01 | 0.073   |
| Fatty liver, yes             | 0.94                | 0.89–1.00 | 0.054   |                       |           |         |
| HTN, yes                     | 0.80                | 0.75–0.84 | <0.001  | 0.86                  | 0.81–0.91 | <0.001  |
| Cardiovascular disease, yes  | 0.84                | 0.79–0.88 | <0.001  | 0.90                  | 0.85–0.95 | <0.001  |
| Cerebrovascular disease, yes | 0.81                | 0.76–0.87 | <0.001  | 0.91                  | 0.85–0.98 | 0.008   |
| Aspirin use, yes             | 0.57                | 0.50–0.65 | <0.001  | 0.63                  | 0.55–0.72 | <0.001  |
| DPP-4 inhibitor use, yes     | 0.78                | 0.70–0.88 | <0.001  | 0.89                  | 0.79–1.00 | 0.060   |
| Insulin use, yes             | 1.13                | 1.06–1.20 | <0.001  | 1.25                  | 1.17–1.33 | <0.001  |
| Metformin use, yes           | 0.68                | 0.59–0.78 | <0.001  | 0.72                  | 0.61–0.84 | <0.001  |
| SGLT-2 inhibitor use, yes    | 0.70                | 0.50–0.98 | 0.038   |                       |           |         |
| Sulfonylurea use, yes        | 0.73                | 0.61–0.86 | <0.001  | 0.84                  | 0.70–1.01 | 0.064   |
| Thiazolidinedione use, yes   | 0.64                | 0.49–0.85 | 0.002   | 0.76                  | 0.57–1.01 | 0.063   |

Abbreviations: CI, confidence interval; HR, hazard ratio; DM, diabetes mellitus; HTN, hypertension; DPP, dipeptidyl peptidase; PFS, progression free survival; PS, propensity score; SGLT, sodium-glucose cotransporter; TKI, tyrosine kinase inhibitor.

**Table S5.** Univariate and multivariate cox regression analysis for OS treated with sorafenib according to statin use pattern in a PS-matched cohort.

| Variables                         | Univariate analysis |           |         | Multivariate analysis |                 |         |
|-----------------------------------|---------------------|-----------|---------|-----------------------|-----------------|---------|
|                                   | HR                  | 95% CI    | P-value | HR                    | 95% CI          | P-value |
| Statin use pattern                |                     |           |         |                       |                 |         |
| Non-user                          |                     | Reference |         |                       | Reference       |         |
| Pre-TKI use                       | 1.31                | 1.13–     | <0.001  | 1.28                  | 1.10– 1.49      | 0.002   |
| Continuous use from TKI treatment | 0.80                | 0.74–     | 0.87    | 0.87                  | 0.80– 0.95      | 0.002   |
| post-TKI use                      | 0.40                | 0.35–     | 0.46    | 0.44                  | 0.38– 0.51      | <0.001  |
| Age, ≥60 yr                       | 0.99                | 0.94–     | 1.04    | 0.624                 | 1.00– 1.01      | 0.444   |
| Sex, female                       | 0.99                | 0.94–     | 1.04    | 0.624                 | 0.95 0.88– 1.03 | 0.218   |
| Region, urban                     | 0.96                | 0.89–     | 1.03    | 0.249                 |                 |         |
| DM, yes                           | 0.92                | 0.86–     | 0.99    | 0.022                 | 0.93 0.87– 1.00 | 0.053   |
| Fatty liver, yes                  | 0.90                | 0.84–     | 0.96    | <0.001                | 0.94 0.88– 1.00 | 0.058   |
| HTN, yes                          | 0.80                | 0.75–     | 0.85    | <0.001                | 0.94 0.88– 1.00 | 0.058   |
| Cardiovascular disease, yes       | 0.86                | 0.81–     | 0.91    | <0.001                | 0.93 0.88– 0.99 | 0.015   |
| Cerebrovascular disease, yes      | 0.86                | 0.80–     | 0.92    | <0.001                |                 |         |
| Aspirin use, yes                  | 0.61                | 0.53–     | 0.70    | <0.001                | 0.67 0.58– 0.78 | <0.001  |
| DPP-4 inhibitor use, yes          | 0.85                | 0.75–     | 0.95    | 0.006                 | 0.90 0.79– 1.02 | 0.100   |
| Insulin use, yes                  | 1.14                | 1.07–     | 1.22    | <0.001                | 1.19 1.11– 1.27 | <0.001  |
| Metformin use, yes                | 0.75                | 0.65      | 0.87    | <0.001                | 0.82 0.70– 0.96 | 0.016   |
| SGLT-2 inhibitor use, yes         | 0.60                | 0.41      | 0.88    | 0.001                 | 0.68 0.46– 1.00 | 0.048   |
| Sulfonylurea use, yes             | 0.76                | 0.63      | 0.91    | 0.003                 | 0.80 0.66– 0.97 | 0.025   |

Thiazolidinedione use, yes 0.65 0.47 0.89 0.007

Abbreviations: CI, confidence interval; HR, hazard ratio; DM, diabetes mellitus; HTN, hypertension; DPP, dipeptidyl peptidase; OS, overall survival; PS, propensity score; SGLT, sodium-glucose co-transporter; TKI, tyrosine kinase inhibitor.

**Table S6.** Univariate and multivariate cox regression analysis for PFS treated with sorafenib according to statin use pattern in a PS-matched cohort.

| Variables                         | Univariate analysis |           |         | Multivariate analysis |           |         |
|-----------------------------------|---------------------|-----------|---------|-----------------------|-----------|---------|
|                                   | HR                  | 95% CI    | P-value | HR                    | 95% CI    | P-value |
| Statin use pattern                |                     |           |         |                       |           |         |
| Non-user                          |                     | Reference |         |                       | Reference |         |
| Pre-TKI use                       | 1.53                | 1.33 1.77 | <0.001  | 1.56                  | 1.35 1.81 | <0.001  |
| Continuous use from TKI treatment | 0.86                | 0.80 0.93 | <0.001  | 0.94                  | 0.87 1.02 | 0.125   |
| post-TKI use                      | 0.38                | 0.34 0.43 | <0.001  | 0.43                  | 0.38 0.48 | <0.001  |
| Age, ≥60 yr                       | 1.04                | 0.99 1.09 | 0.156   | 1.00                  | 1.00 1.01 | 0.015   |
| Sex, female                       | 0.98                | 0.91 1.06 | 0.603   | 1.02                  | 0.95 1.10 | 0.5962  |
| Region, urban                     | 0.88                | 0.82 0.94 | <0.001  | 0.86                  | 0.80 0.92 | <0.001  |
| DM, yes                           | 0.91                | 0.85 0.98 | 0.007   | 0.92                  | 0.86 0.98 | 0.017   |
| Fatty liver, yes                  | 0.94                | 0.89 1.00 | 0.054   |                       |           |         |
| HTN, yes                          | 0.80                | 0.75 0.84 | <0.001  | 0.86                  | 0.81 0.91 | <0.001  |
| Cardiovascular disease, yes       | 0.84                | 0.79 0.88 | <0.001  | 0.90                  | 0.85 0.95 | 0.0002  |
| Cerebrovascular disease, yes      | 0.81                | 0.76 0.87 | <0.001  | 0.92                  | 0.86 0.99 | 0.027   |
| Aspirin use, yes                  | 0.57                | 0.50 0.65 | <0.001  | 0.67                  | 0.58 0.77 | <0.001  |
| DPP-4 inhibitor use, yes          | 0.78                | 0.70 0.88 | <0.001  | 0.87                  | 0.77 0.99 | 0.028   |
| Insulin use, yes                  | 1.13                | 1.06 1.20 | <0.001  | 1.23                  | 1.15 1.32 | <0.001  |
| Metformin use, yes                | 0.68                | 0.59 0.78 | <0.001  | 0.74                  | 0.64 0.87 | <0.001  |
| SGLT-2 inhibitor use, yes         | 0.70                | 0.50 0.98 | 0.038   |                       |           |         |
| Sulfonylurea use, yes             | 0.73                | 0.61 0.86 | <0.001  | 0.83                  | 0.69 1.00 | 0.048   |
| Thiazolidinedione use, yes        | 0.64                | 0.49 0.85 | 0.002   | 0.79                  | 0.59 1.06 | 0.114   |

Abbreviations: CI, confidence interval; HR, hazard ratio; DM, diabetes mellitus; HTN, hypertension; DPP, dipeptidyl peptidase; PFS, progression free survival; PS, propensity score; SGLT, sodium-glucose cotransporter; TKI, tyrosine kinase inhibitor.

**Table S7.** Univariate and multivariate cox regression analysis for OS treated with lenvatinib according to statin use in a PS-matched cohort.

| Variables                    | Univariate analysis |           |         | Multivariate analysis |           |         |
|------------------------------|---------------------|-----------|---------|-----------------------|-----------|---------|
|                              | HR                  | 95% CI    | P-value | HR                    | 95% CI    | P-value |
| Statin use, yes              | 0.71                | 0.66 0.76 | <0.001  | 0.91                  | 0.65 1.28 | 0.581   |
| Age, ≥60 yr                  | 0.99                | 0.94 1.04 | 0.624   | 0.99                  | 0.96 1.01 | 0.152   |
| Sex, female                  | 0.93                | 0.86 1.01 | 0.080   | 1.24                  | 0.76 2.03 | 0.387   |
| Region, urban                | 0.96                | 0.89 1.03 | 0.249   |                       |           |         |
| Etiology                     |                     |           |         |                       |           |         |
| HBV                          | 1.03                | 0.97 1.10 | 0.310   |                       |           |         |
| HCV                          | 0.97                | 0.90 1.05 | 0.468   |                       |           |         |
| Alcoholic                    | 0.97                | 0.91 1.04 | 0.443   | 0.71                  | 0.46 1.10 | 0.123   |
| DM, yes                      | 0.92                | 0.86 0.99 | 0.022   |                       |           |         |
| Fatty liver, yes             | 0.90                | 0.84 0.96 | 0.001   |                       |           |         |
| HTN, yes                     | 0.80                | 0.75 0.85 | <0.001  |                       |           |         |
| Cardiovascular disease, yes  | 0.86                | 0.81 0.91 | <0.001  |                       |           |         |
| Cerebrovascular disease, yes | 0.86                | 0.80 0.92 | <0.001  |                       |           |         |
| Aspirin use, yes             | 0.61                | 0.53 0.70 | <0.001  |                       |           |         |

|                            |      |      |      |        |      |      |      |        |
|----------------------------|------|------|------|--------|------|------|------|--------|
| DPP-4 inhibitor use, yes   | 0.85 | 0.75 | 0.95 | 0.006  |      |      |      |        |
| Insulin use, yes           | 1.14 | 1.07 | 1.22 | <0.001 | 2.49 | 1.79 | 3.44 | <0.001 |
| Metformin use, yes         | 0.75 | 0.65 | 0.87 | <0.001 |      |      |      |        |
| SGLT-2 inhibitor use, yes  | 0.60 | 0.41 | 0.88 | 0.010  |      |      |      |        |
| Sulfonylurea use, yes      | 0.76 | 0.63 | 0.91 | 0.003  |      |      |      |        |
| Thiazolidinedione use, yes | 0.65 | 0.47 | 0.89 | 0.007  |      |      |      |        |

Abbreviations: CI, confidence interval; HR, hazard ratio; DM, diabetes mellitus; HBV, hepatitis B virus; HCV, hepatitis C virus; HTN, hypertension; DPP, dipeptidyl peptidase; OS, overall survival; PS, propensity score; SGLT, sodium-glucose cotransporter; TKI, tyrosine kinase inhibitor.

**Table S8.** Univariate and multivariate cox regression analysis for PFS treated with lenvatinib according to statin use in a PS-matched cohort.

| Variables                    | Univariate analysis |        |         | Multivariate analysis |        |         |      |        |
|------------------------------|---------------------|--------|---------|-----------------------|--------|---------|------|--------|
|                              | HR                  | 95% CI | P-value | HR                    | 95% CI | P-value |      |        |
| Statin use, yes              | 0.72                | 0.67   | 0.76    | <0.001                | 0.81   | 0.59    | 1.11 | 0.184  |
| Age, ≥60 yr                  | 1.04                | 0.99   | 1.04    | 0.156                 | 0.98   | 0.97    | 1.00 | 0.084  |
| Sex, female                  | 0.98                | 0.91   | 1.06    | 0.603                 | 1.20   | 0.78    | 1.86 | 0.403  |
| Region, urban                | 0.88                | 0.82   | 0.94    | <0.001                |        |         |      |        |
| Etiology                     |                     |        |         |                       |        |         |      |        |
| HBV                          | 0.95                | 0.90   | 1.01    | 0.103                 |        |         |      |        |
| HCV                          | 0.92                | 0.86   | 0.99    | 0.034                 |        |         |      |        |
| Alcoholic                    | 1.03                | 0.96   | 1.10    | 0.373                 |        |         |      |        |
| DM, yes                      | 0.91                | 0.85   | 0.98    | 0.001                 |        |         |      |        |
| Fatty liver, yes             | 0.94                | 0.89   | 1.00    | 0.054                 |        |         |      |        |
| HTN, yes                     | 0.80                | 0.75   | 0.84    | <0.001                |        |         |      |        |
| Cardiovascular disease, yes  | 0.84                | 0.79   | 0.88    | <0.001                |        |         |      |        |
| Cerebrovascular disease, yes | 0.81                | 0.76   | 0.87    | <0.001                |        |         |      |        |
| Aspirin use, yes             | 0.57                | 0.50   | 0.65    | <0.001                |        |         |      |        |
| DPP-4 inhibitor use, yes     | 0.78                | 0.70   | 0.88    | <0.001                |        |         |      |        |
| Insulin use, yes             | 1.13                | 1.06   | 1.20    | <0.001                | 1.97   | 1.44    | 2.70 | <0.001 |
| Metformin use, yes           | 0.68                | 0.59   | 0.78    | <0.001                |        |         |      |        |
| SGLT-2 inhibitor use, yes    | 0.70                | 0.50   | 0.98    | 0.038                 |        |         |      |        |
| Sulfonylurea use, yes        | 0.73                | 0.61   | 0.86    | <0.001                |        |         |      |        |
| Thiazolidinedione use, yes   | 0.64                | 0.49   | 0.85    | 0.002                 |        |         |      |        |

Abbreviations: CI, confidence interval; HR, hazard ratio; DM, diabetes mellitus; HBV, hepatitis B virus; HCV, hepatitis C virus; HTN, hypertension; DPP, dipeptidyl peptidase; PFS, progression free survival; PS, propensity score; SGLT, sodium-glucose cotransporter.

**Table S9.** Univariate and multivariate cox regression analysis for OS treated with lenvatinib according to statin use pattern in a PS-matched cohort.

| Variables                         | Univariate analysis |           |         | Multivariate analysis |           |         |      |       |
|-----------------------------------|---------------------|-----------|---------|-----------------------|-----------|---------|------|-------|
|                                   | HR                  | 95% CI    | P-value | HR                    | 95% CI    | P-value |      |       |
| Statin use pattern                |                     |           |         |                       |           |         |      |       |
| Non-user                          |                     | Reference |         |                       | Reference |         |      |       |
| Pre-TKI use                       | 1.31                | 1.13      | 1.52    | <0.001                | 2.27      | 1.23    | 4.22 | 0.009 |
| Continuous use from TKI treatment | 0.80                | 0.74      | 0.87    | <0.001                | 0.95      | 0.63    | 1.42 | 0.793 |
| Post-TKI use                      | 0.40                | 0.35      | 0.46    | <0.001                | 0.29      | 0.11    | 0.79 | 0.015 |
| Age, ≥60 yr                       | 0.99                | 0.94      | 1.04    | 0.624                 | 0.98      | 0.96    | 1.00 | 0.034 |
| Sex, female                       | 0.93                | 0.86      | 1.01    | 0.080                 | 1.23      | 0.75    | 2.00 | 0.409 |
| Region, urban                     | 0.96                | 0.89      | 1.03    | 0.249                 |           |         |      |       |
| Etiology                          |                     |           |         |                       |           |         |      |       |

|                              |      |      |      |        |      |      |      |        |
|------------------------------|------|------|------|--------|------|------|------|--------|
| HBV                          | 1.03 | 0.97 | 1.10 | 0.310  |      |      |      |        |
| HCV                          | 0.97 | 0.90 | 1.05 | 0.468  |      |      |      |        |
| Alcoholic                    | 0.97 | 0.91 | 1.04 | 0.443  | 0.62 | 0.41 | 0.95 | 0.029  |
| DM, yes                      | 0.92 | 0.86 | 0.99 | 0.022  |      |      |      |        |
| Fatty liver, yes             | 0.90 | 0.84 | 0.96 | <0.001 |      |      |      |        |
| HTN, yes                     | 0.80 | 0.75 | 0.85 | <0.001 |      |      |      |        |
| Cardiovascular disease, yes  | 0.86 | 0.81 | 0.91 | <0.001 |      |      |      |        |
| Cerebrovascular disease, yes | 0.86 | 0.80 | 0.92 | <0.001 |      |      |      |        |
| Aspirin use, yes             | 0.61 | 0.53 | 0.70 | <0.001 |      |      |      |        |
| DPP-4 inhibitor use, yes     | 0.85 | 0.75 | 0.95 | 0.006  |      |      |      |        |
| Insulin use, yes             | 1.14 | 1.07 | 1.22 | <0.001 | 2.30 | 1.66 | 3.18 | <0.001 |
| Metformin use, yes           | 0.75 | 0.65 | 0.87 | <0.001 |      |      |      |        |
| SGLT-2 inhibitor use, yes    | 0.60 | 0.41 | 0.88 | 0.010  |      |      |      |        |
| Sulfonylurea use, yes        | 0.76 | 0.63 | 0.91 | 0.003  |      |      |      |        |
| Thiazolidinedione use, yes   | 0.65 | 0.47 | 0.89 | 0.007  |      |      |      |        |

Abbreviations: CI, confidence interval; HR, hazard ratio; DM, diabetes mellitus; HBV, hepatitis B virus; HCV, hepatitis C virus; HTN, hypertension; DPP, dipeptidyl peptidase; OS, overall survival; PS, propensity score; SGLT, sodium-glucose cotransporter; TKI, tyrosine kinase inhibitor.

**Table S10.** Univariate and multivariate cox regression analysis for the PFS treated with lenvatinib according to the statin use pattern in a PS-matched cohort.

| Variables                         | Univariate analysis |           |      |         | Multivariate analysis |           |      |         |
|-----------------------------------|---------------------|-----------|------|---------|-----------------------|-----------|------|---------|
|                                   | HR                  | 95% CI    |      | P-value | HR                    | 95% CI    |      | P-value |
| Statin use pattern                |                     |           |      |         |                       |           |      |         |
| Non-user                          |                     | Reference |      |         |                       | Reference |      |         |
| Pre-TKI use                       | 1.53                | 1.33      | 1.77 | <0.001  | 1.25                  | 0.65      | 2.40 | 0.496   |
| Continuous use from TKI treatment | 0.86                | 0.80      | 0.93 | <0.001  | 0.95                  | 0.65      | 1.37 | 0.768   |
| Post-TKI use                      | 0.38                | 0.34      | 0.43 | <0.001  | 0.36                  | 0.17      | 0.77 | 0.009   |
| Age, ≥60 yr                       | 1.04                | 0.99      | 1.09 | 0.156   | 0.98                  | 0.96      | 1.00 | 0.048   |
| Sex, female                       | 0.98                | 0.91      | 1.06 | 0.603   | 1.16                  | 0.75      | 1.81 | 0.499   |
| Region, urban                     | 0.88                | 0.82      | 0.94 | <0.001  |                       |           |      |         |
| Etiology                          |                     |           |      |         |                       |           |      |         |
| HBV                               | 0.95                | 0.90      | 1.01 | 0.103   |                       |           |      |         |
| HCV                               | 0.92                | 0.86      | 0.99 | 0.034   |                       |           |      |         |
| Alcoholic                         | 1.03                | 0.96      | 1.10 | 0.373   |                       |           |      |         |
| DM, yes                           | 0.91                | 0.85      | 0.98 | 0.007   |                       |           |      |         |
| Fatty liver, yes                  | 0.94                | 0.89      | 1.00 | 0.054   |                       |           |      |         |
| HTN, yes                          | 0.80                | 0.75      | 0.84 | <0.001  |                       |           |      |         |
| Cardiovascular disease, yes       | 0.84                | 0.79      | 0.88 | <0.001  |                       |           |      |         |
| Cerebrovascular disease, yes      | 0.81                | 0.76      | 0.87 | <0.001  |                       |           |      |         |
| Aspirin use, yes                  | 0.57                | 0.50      | 0.65 | <0.001  |                       |           |      |         |
| DPP-4 inhibitor use, yes          | 0.78                | 0.70      | 0.88 | <0.001  |                       |           |      |         |
| Insulin use, yes                  | 1.13                | 1.06      | 1.20 | <0.001  | 1.93                  | 1.40      | 2.65 | <0.001  |
| Metformin use, yes                | 0.68                | 0.59      | 0.78 | <0.001  |                       |           |      |         |
| SGLT-2 inhibitor use, yes         | 0.70                | 0.50      | 0.98 | 0.038   |                       |           |      |         |
| Sulfonylurea use, yes             | 0.73                | 0.61      | 0.86 | <0.001  |                       |           |      |         |
| Thiazolidinedione use, yes        | 0.64                | 0.49      | 0.85 | 0.002   |                       |           |      |         |

Abbreviations: Abbreviations: CI, confidence interval; HR, hazard ratio; DM, diabetes mellitus; HBV, hepatitis B virus; HCV, hepatitis C virus; HTN, hypertension; DPP, dipeptidyl peptidase; PFS, progression free survival; PS, propensity score; SGLT, sodium-glucose cotransporter; TKI, tyrosine kinase inhibitor.

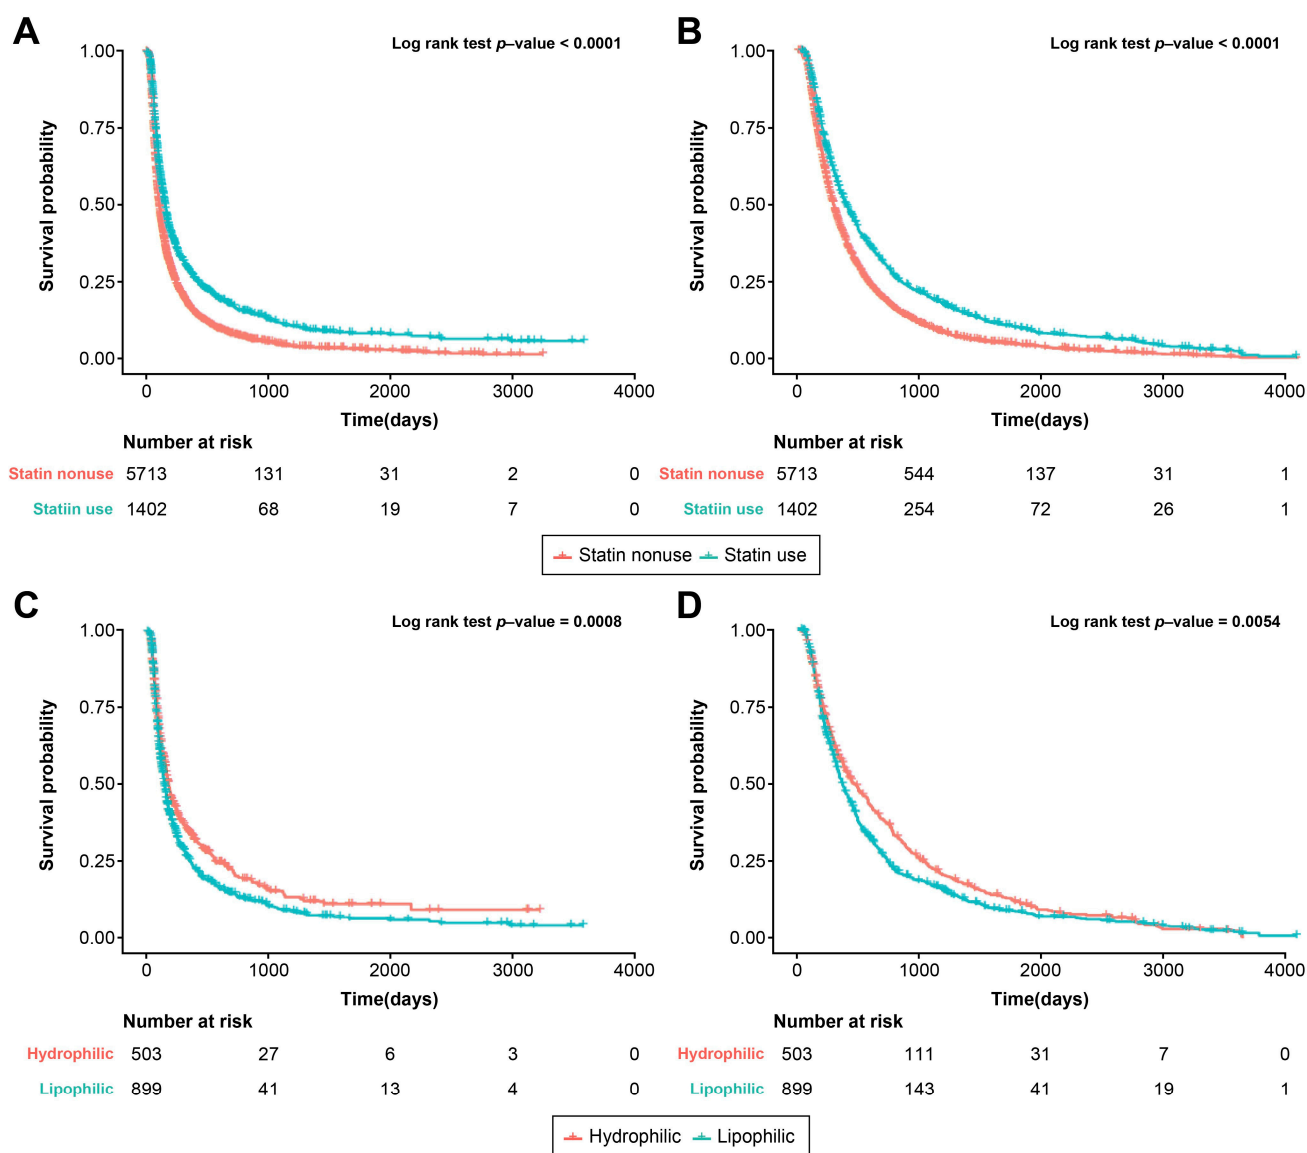

**Figure S1.** Kaplan–Meier curves of OS and PFS according to statin use and statin type in the sorafenib subgroup. (a) Comparison of OS between statin users and non-users. (b) Comparison of PFS between statin users and non-users. (c) Comparison of OS according to statin type (hydrophilic vs lipophilic). (d) Comparison of PFS according to statin type (hydrophilic vs lipophilic). OS; overall survival, PFS; progression-free survival.

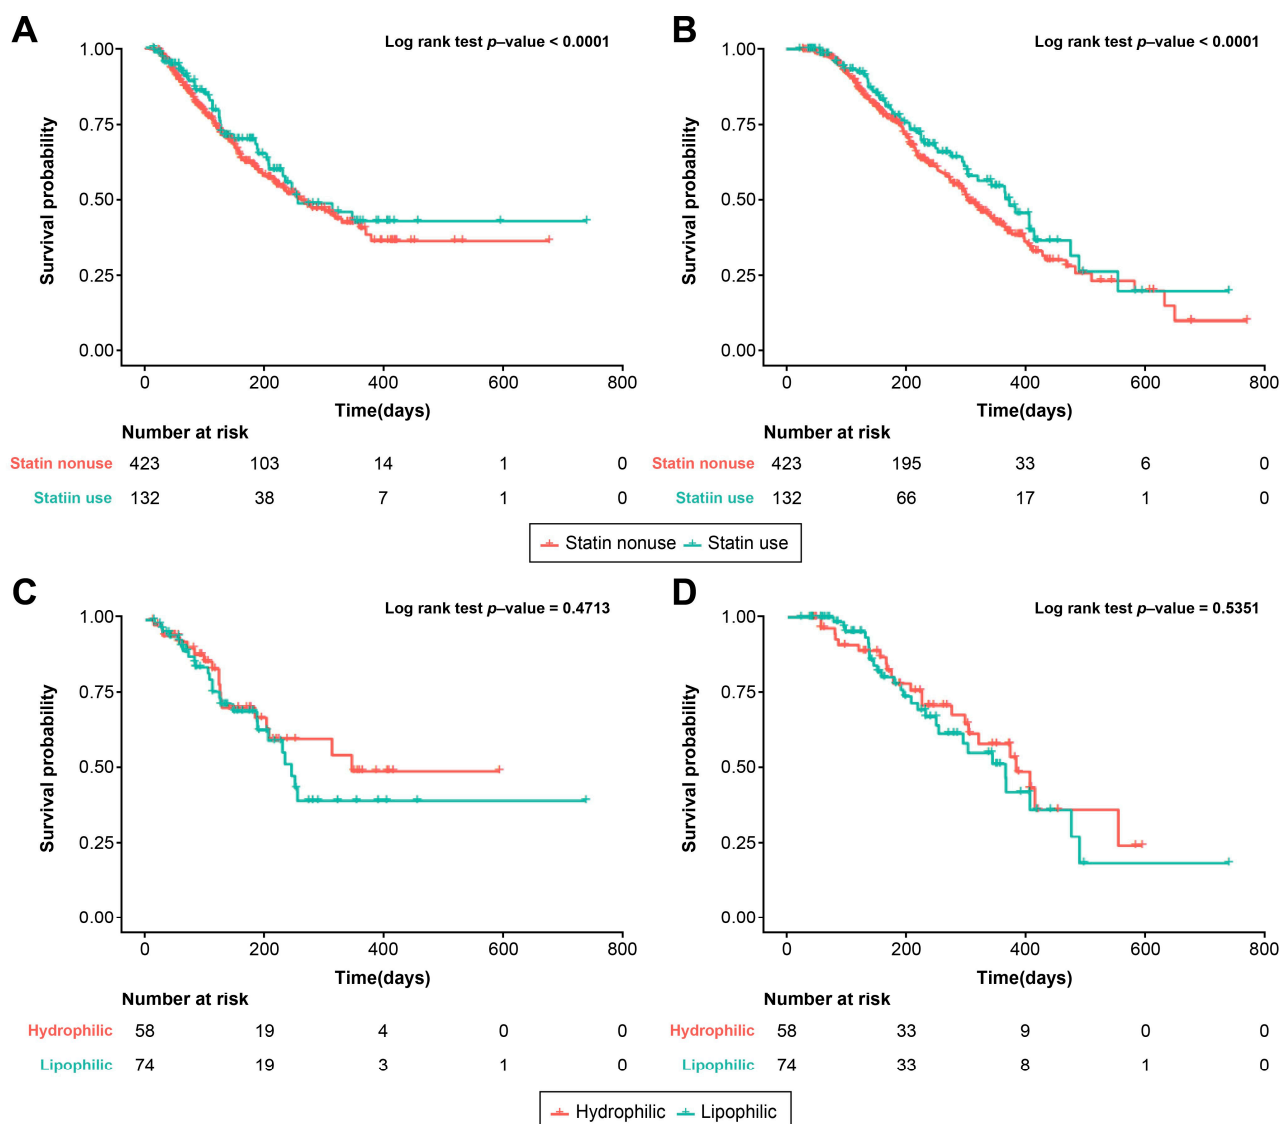

**Figure S2.** Kaplan–Meier curves of OS and PFS according to statin use and statin type in the lenvatinib subgroup. (a) Comparison of OS between statin users and non-users. (b) Comparison of PFS between statin users and non-users. (c) Comparison of OS according to statin type (hydrophilic vs lipophilic). (d) Comparison of PFS according to statin type (hydrophilic vs lipophilic). OS; overall survival, PFS; progression-free survival.
